# Supplementary material for: Antimicrobial Resistance Pattern, Clustering Mechanisms and Correlation Matrix of Drug-Resistant Escherichia coli in Black Bengal Goats in West Bengal, India
Source: MDPI journal article supplement (doi:10.3390/antibiotics11101344), 2022-10-01
Supplement: s1 [file s1]

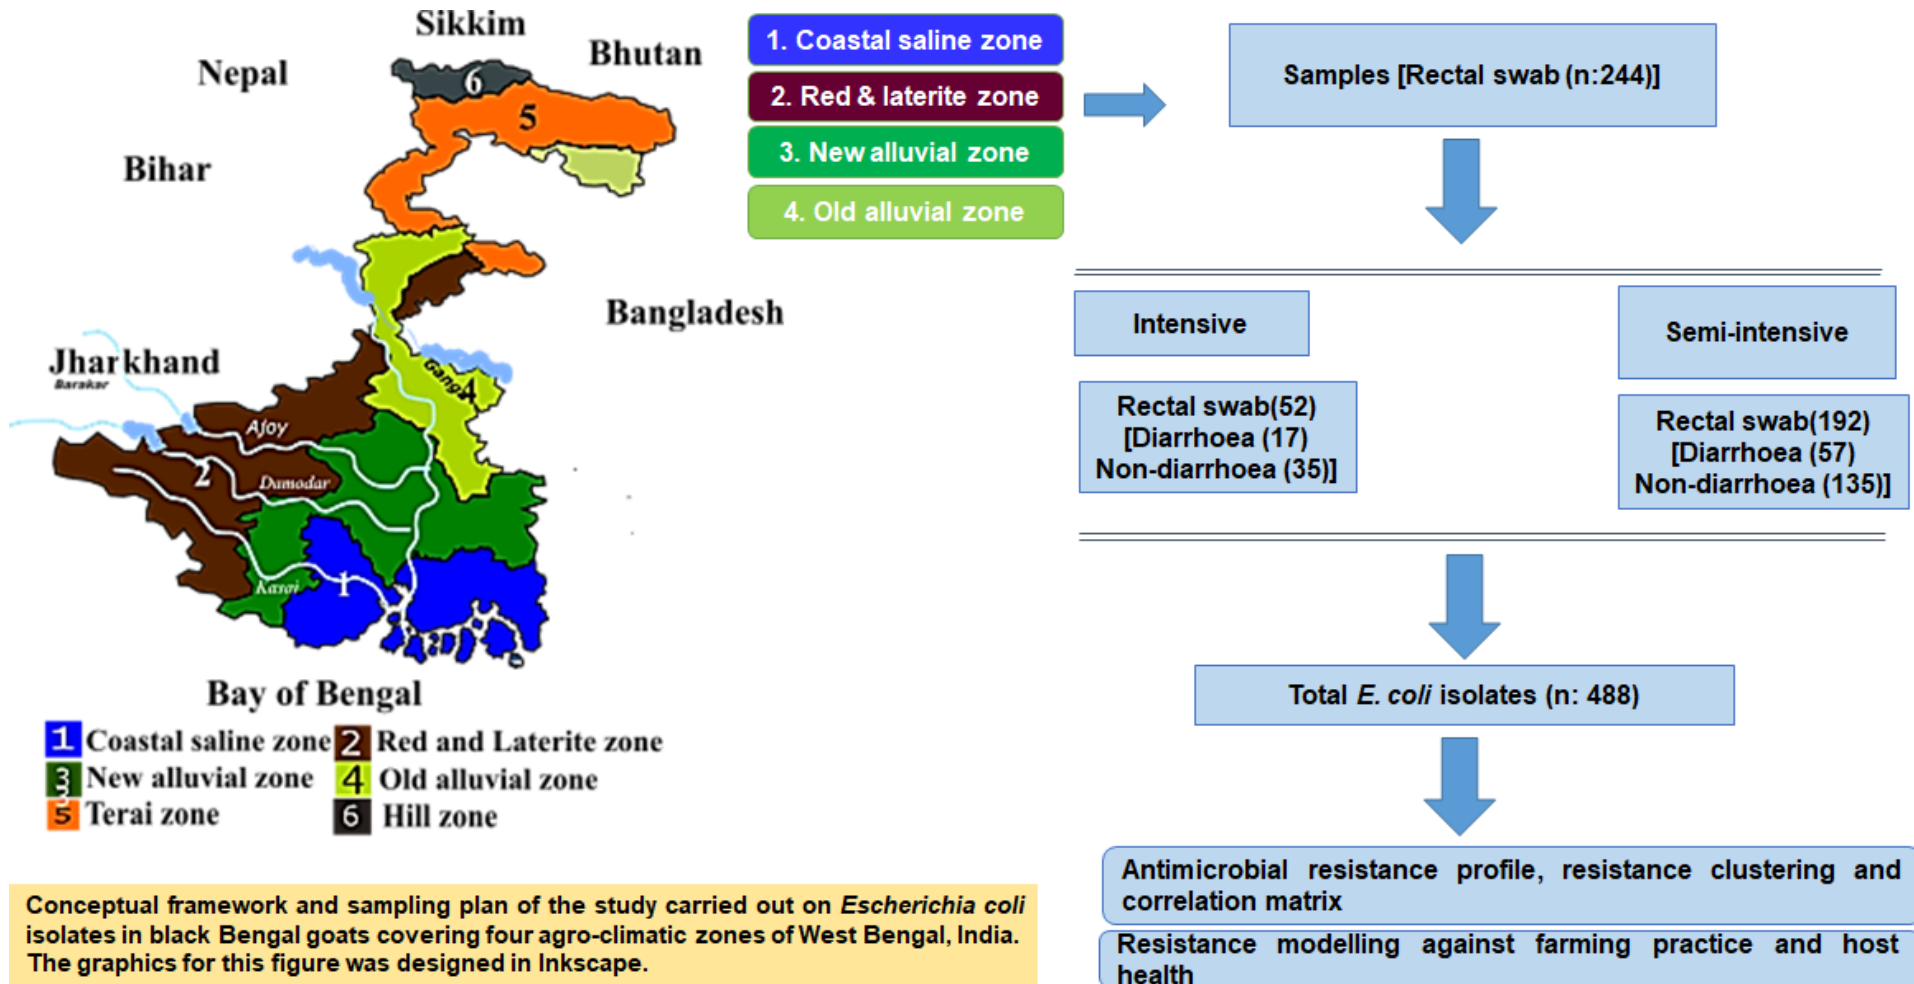

Figure S1: Conceptual framework and sampling plan of the study carried out on *E. coli* isolates in black Bengal goats covering four agro-climatic zones of West Bengal, India. The graphics for this figure was designed in Inkscape.

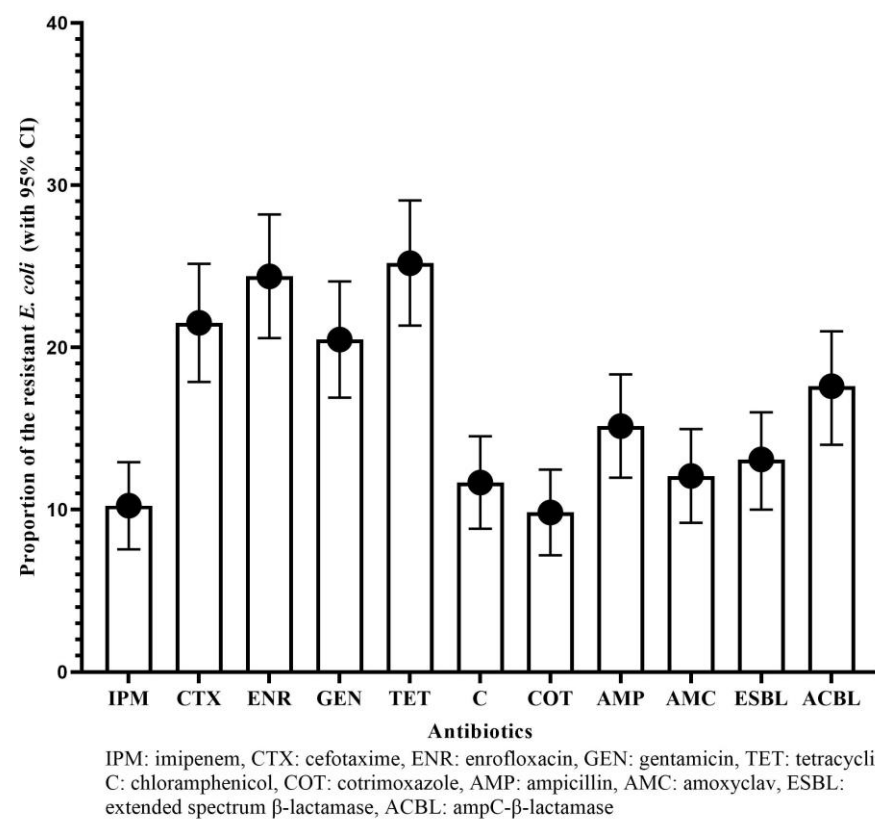

Figure S2: Proportion of the rectal *E. coli* (n: 488) resistant to different antibiotics with 95% CI.
